# Supplementary material for: Regulation of Huntingtin Gene Expression by miRNA-137, -214, -148a, and Their Respective isomiRs
Source: PubMed Central journal article supplement (PMC3759948; doi:10.3390/ijms140816999), 2013-08-19
Supplement: ijms-14-16999-s001.pdf [file ijms-14-16999-s001.pdf]

# Supplementary Information

**Table S1.** The sequences of miRNA binding sites cloned in reporter constructs.

| miRNA    | Construct strand | Sequence 5'-3'                                      |
|----------|------------------|-----------------------------------------------------|
| miR-137  | WT 1             | AAAGTGGAGCTCGGGACGGATAGTAGACAGCAATAAAGCTCGGTGTGTT   |
|          | WT 2             | CTAGAACACACCGAGTTATTGCTGTCTACTATCCGTCCCGAGCTCCACTTT |
|          | MUT 1            | AAAGTGGAGCTCGGGACGGATAGTAGACATCGACAAGCTCGGTGTGTT    |
|          | MUT 2            | CTAGAACACACCGAGTTGTCGATGTCTACTATCCGTCCCGAGCTCCACTTT |
|          | PM 1             | AAAGTGGAGCTCGCTACGCGTATTCTTAAGCAATAAAGCTCGGTGTGTT   |
|          | PM 2             | CTAGAACACACCGAGTTATTGCTTAAGAATACGCGTAGCGAGCTCCACTTT |
| miR-214  | WT 1             | AAACTGTGGGGAGATTGCTTTTGTTCCTGCTGGTAATATCGGGTT       |
|          | WT 2             | CTAGACCCGATATTACCAGCAGGAAAACAAAAGCAATCTCCCCACAGTTT  |
|          | MUT 1            | AAACTGTGGGGAGATTGCTTTTGTTCCTGCTGGTAATATCGGGTT       |
|          | MUT 2            | CTAGACCCGATATTACCGGAGGTAAAACAAAAGCAATCTCCCCACAGTTT  |
|          | PM 1             | AAACTGTGGGGAGAAACTGCCTGTCTGTGCTGCTGTATATCGGGTT      |
|          | PM 2             | CTAGACCCGATATACAGCAGGCACAGACAGGCAGTTTCTCCCCACAGTTT  |
| miR-148a | WT 1             | AAATGAAACCAGGGTAGAATTGTTTGGCAATGCACTGAAGCGTGTT      |
|          | WT 2             | CTAGAACACGCTTCAGTGCATTGCCAAACAATTCTACCCTGGTTTCATTT  |
|          | MUT 1            | AAATGAAACCAGGGTAGAATTGTTTGGCAAGGAACGAAGCGTGTT       |
|          | MUT 2            | CTAGAACACGCTTCGTTCTTTGCCAAATTCTACCCTGGTTTCATTT      |
|          | PM 1             | AAATGAAACCAGGACAAAGTTCTGTAGTGCCTGATGAAGCGTGTT       |
|          | PM 2             | CTAGAACACGCTTCATCAGTGCCTACAGAACTTTGTCCTGGTTTCATTT   |

**Table S2.** Oligodeoxynucleotide sequences used as miRNA mimics.

| Mimic name    | Strand    | Sequence 5'-3'             |
|---------------|-----------|----------------------------|
| miR-137       | antisense | UUAUUGCUUAAGAAUACGCGUAGUC  |
|               | sense     | CUACGCGUAUUCUUAAGCAAUAAUU  |
| isomiR-137+1  | antisense | GUUAUUGCUUAAGAAUACGCGUAG   |
|               | sense     | ACGCGUAUUCUUAAGCAAUAAUU    |
| isomiR-137-1  | antisense | UAUUGCUUAAGAAUACGCGUAGUC   |
|               | sense     | CUACGCGUAUUCUUAAGCAAUAAUU  |
| miR-214       | antisense | ACAGCAGGCACAGACAGGCAGUCA   |
|               | sense     | ACUGCCUGUCUGUGCCUGCUGUUU   |
| isomiR-214+1  | antisense | UACAGCAGGCACAGACAGGCAGUCA  |
|               | sense     | ACUGCCUGUCUGUGCCUGCUGUAAU  |
| isomiR-214-1  | antisense | CAGCAGGCACAGACAGGCAGUCA    |
|               | sense     | ACUGCCUGUCUGUGCCUGCUGUU    |
| isomiR-214+2  | antisense | GUACAGCAGGCACAGACAGGCAGUCA |
|               | sense     | ACUGCCUGUCUGUGCCUGCUGUACUU |
| miR-148a      | antisense | UCAGUGCACUACAGAACUUUGUCU   |
|               | sense     | ACAAAGUUCUGUAGUGCACUGAUU   |
| isomiR-148a+1 | antisense | GUCAGUGCACUACAGAACUUUGUCU  |
|               | sense     | ACAAAGUUCUGUAGUGCACUGACUU  |
| isomiR-148a-1 | antisense | CAGUGCACUACAGAACUUUGUCU    |
|               | sense     | ACAAAGUUCUGUAGUGCACUGUU    |

**Table S3.** Oligodeoxynucleotide sequences used as northern blot probes.

| Detected sequence | Probe sequence          |
|-------------------|-------------------------|
| miR-137-3P        | CTACGCGTATTCTTAAGCAATAA |
| miR-214-3P        | ACTGCCTGTCTGTGCCTGCTGT  |
| miR-148a-3P       | ACAAAGTTCTGTAGTGCACTGA  |

**Figure S1.** Reduction in the huntingtin protein levels after treatment with canonical miRNAs.

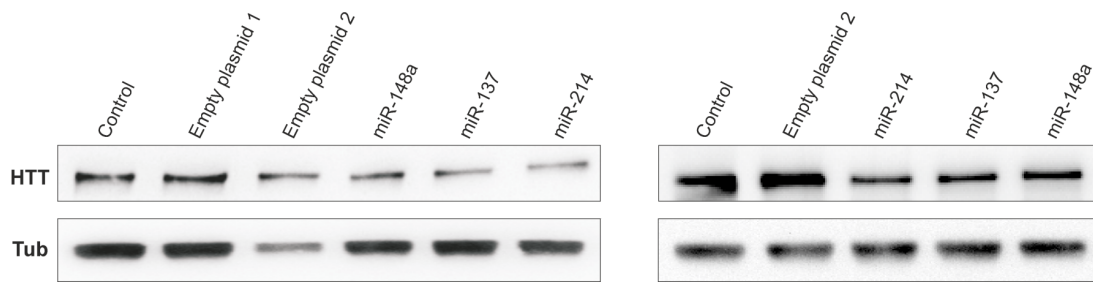

**Figure S2.** Lack of regulation of the huntingtin expression by miR-107.

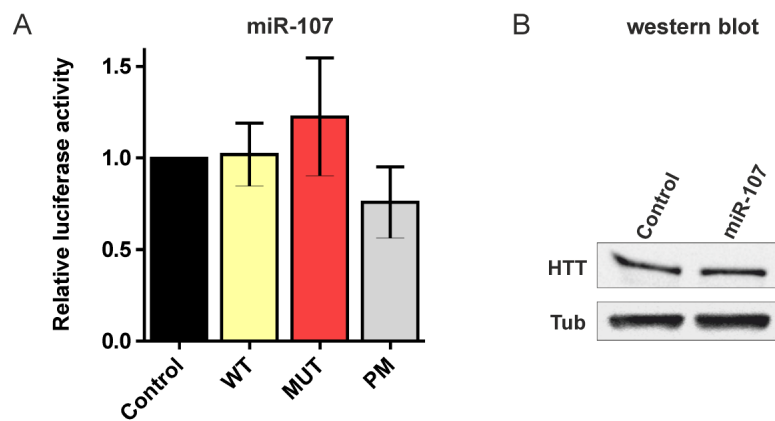

© 2013 by the authors; licensee MDPI, Basel, Switzerland. This article is an open access article distributed under the terms and conditions of the Creative Commons Attribution license (<http://creativecommons.org/licenses/by/3.0/>).
